# Supplementary material for: Experimental FTIR-MI and Theoretical Studies of Isocyanic Acid Aggregates
Source: MDPI journal article supplement (doi:10.3390/molecules28031430), 2023-02-02
Supplement: s1 [file s1]

## Supplementary Materials

Experimental FTIR-MI and theoretical studies of isocyanic acid aggregates

Justyna Krupa, Maria Wierzejewska, Jan Lundell

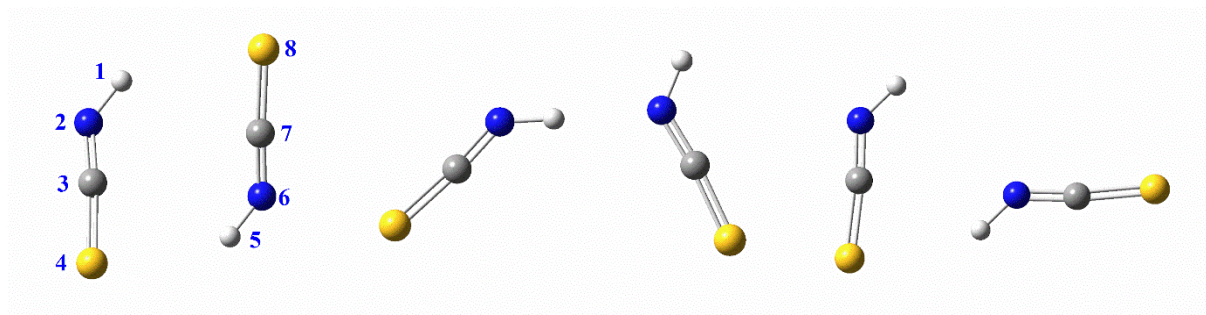

**Figure S1.** The optimized structures of the HNCS dimer. [36]

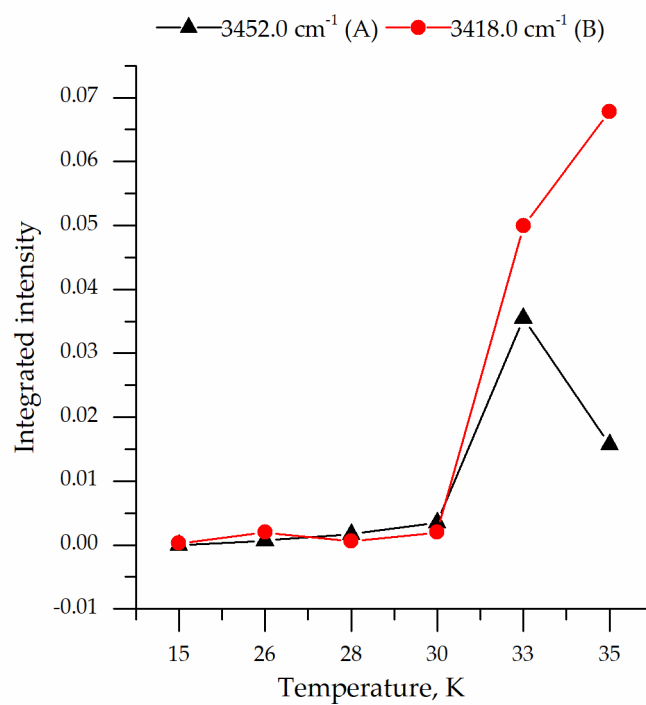

**Figure S2.** Example plots of integrated intensity versus annealing temperature for bands A and B.

**Table S1.** Interatomic distances (Å), angles (degree) and electron density parameters of the intermolecular bond critical points BCP (Atomic units) and ring critical points RCP (Atomic units) of the HNCO trimers computed at the MP2/6-311++G(3df,3pd) level.

| Complex | Geometric Parameters <sup>1</sup> |       |       | AIM Parameters        |           |                   |
|---------|-----------------------------------|-------|-------|-----------------------|-----------|-------------------|
|         | Interatomic distance              |       | Angle | BCP                   | $\rho(r)$ | $\nabla^2\rho(r)$ |
|         | H...Y                             | X...Y |       |                       |           |                   |
| T1      | 2.101                             | 2.998 | 146.1 | H1...N6               | 0.0184    | +0.0648           |
|         | 2.101                             | 2.998 | 146.1 | H5...N10              | 0.0184    | +0.0648           |
|         | 2.101                             | 2.998 | 146.1 | H9...N2               | 0.0184    | +0.0648           |
|         |                                   |       |       | (6 at.) <sup>2</sup>  | 0.0049    | +0.0241           |
| T2      | 2.062                             | 3.014 | 155.6 | H1...O8               | 0.0167    | +0.0676           |
|         | 2.205                             | 3.083 | 144.6 | H5...O12              | 0.0134    | +0.0502           |
|         | 2.014                             | 3.015 | 168.0 | H9...N2               | 0.0230    | +0.0685           |
|         |                                   |       |       | (10 at.) <sup>2</sup> | 0.0014    | +0.0064           |
| T3      | 2.084                             | 3.080 | 165.6 | H1...N6               | 0.0197    | +0.0619           |
|         | 2.188                             | 3.086 | 146.8 | H5...O12              | 0.0136    | +0.0525           |
|         | 2.195                             | 3.067 | 143.3 | H9...N2               | 0.0158    | +0.0546           |
|         |                                   |       |       | (8 at.) <sup>2</sup>  | 0.0025    | +0.0113           |
| T4      | 2.072                             | 3.035 | 158.7 | H1...O8               | 0.0166    | +0.0653           |
|         | 2.072                             | 3.035 | 158.7 | H5...O12              | 0.0166    | +0.0653           |
|         | 2.072                             | 3.035 | 158.7 | H9...O4               | 0.0166    | +0.0653           |
|         |                                   |       |       | (12 at.) <sup>2</sup> | 0.0003    | +0.0014           |
| T5      | 2.047                             | 3.046 | 169.7 | H1...O8               | 0.0170    | +0.0681           |
|         | 2.036                             | 3.048 | 176.5 | H5...N10              | 0.0217    | +0.0663           |
| T6      | 2.052                             | 3.056 | 173.1 | H1...O8               | 0.0165    | +0.0673           |
|         | 2.039                             | 3.044 | 174.5 | H5...O12              | 0.0165    | +0.0690           |
| T7      | 2.367                             | 3.110 | 129.8 | H1...O8               | 0.0093    | +0.0373           |
|         | 2.147                             | 3.154 | 173.4 | H9...N6               | 0.0167    | +0.0559           |
|         |                                   | 3.164 |       | N2...C11              | 0.0062    | +0.0237           |
|         |                                   |       |       | (8 at.) <sup>2</sup>  | 0.0019    | +0.0076           |
| T8      | 2.079                             | 3.089 | 175.3 | H1...N6               | 0.0196    | +0.0627           |
|         |                                   | 2.997 |       | C7...N10              | 0.0077    | +0.0317           |
| T9      |                                   | 3.076 |       | C3...O8               | 0.0065    | +0.0261           |
|         |                                   | 3.199 |       | N6...N10              | 0.0073    | +0.0258           |

<sup>1</sup> X: N or C; Y: N or O

<sup>2</sup> RCP

**Table S2.** Selected unscaled wavenumber shifts ( $\text{cm}^{-1}$ ) calculated for the HNCO dimers using the B2PLYPD3 method with the 6-311++G(3df,3pd) basis set. The calculated infrared intensities ( $\text{km mol}^{-1}$ ) of the bands are given in parentheses.

| B2PLYPD3 <sup>1</sup> |              |              |             | Mode                        |
|-----------------------|--------------|--------------|-------------|-----------------------------|
| D1                    | D2           | D3           | D5          |                             |
| -36<br>(159)          | 10<br>(182)  | -13<br>(326) | -4<br>(297) | $\nu\text{NH}$              |
| -150<br>(833)         | -70<br>(693) |              |             |                             |
| 6<br>(536)            | 11<br>(164)  | 10<br>(1252) | 9<br>(1201) |                             |
| -8<br>(991)           | -2<br>(1476) |              |             | $\nu_{\text{as}}\text{NCO}$ |
| 84<br>(211)           | 19<br>(252)  | -11<br>(540) | 12<br>(405) |                             |
| 29<br>(296)           | -40<br>(280) |              |             |                             |
| 49<br>(26)            | 37<br>(61)   | -9<br>(173)  | -4<br>(96)  | $\delta\text{HNC}$          |
| 18<br>(82)            | -4<br>(106)  |              |             |                             |
|                       |              |              |             |                             |

<sup>1</sup> The theoretical shifts were calculated relative to the unscaled harmonic frequencies of HNCO monomer at 3702, 2319, 803 and 575  $\text{cm}^{-1}$ .

**Table S3.** Selected unscaled wavenumber shifts (cm<sup>-1</sup>) for the vNH region calculated for the HNCO trimers using the MP2, B3LYP and B2PLYPD3 methods with the 6-311++G(3df,3pd) basis set. The calculated infrared intensities (km mol<sup>-1</sup>) of the bands are given in parentheses.

| B3LYPD3 <sup>2</sup> |       |       |       |        |        |       |       |       | MP2 <sup>2</sup> |       |       |       |        |        |       |       |       | B2PLYPD3 <sup>2</sup> |       |       |       |        |        |       |       |       | Mode | Exp.    |                 |
|----------------------|-------|-------|-------|--------|--------|-------|-------|-------|------------------|-------|-------|-------|--------|--------|-------|-------|-------|-----------------------|-------|-------|-------|--------|--------|-------|-------|-------|------|---------|-----------------|
| T1                   | T2    | T3    | T4    | T5     | T6     | T7    | T8    | T9    | T1               | T2    | T3    | T4    | T5     | T6     | T7    | T8    | T9    | T1                    | T2    | T3    | T4    | T5     | T6     | T7    | T8    | T9    |      | v       | Δv <sup>1</sup> |
| -204                 | -65   | -124  | -92   | -43    | 14     | -16   | -38   | -6    | -183             | -68   | -121  | -80   | -46    | 14     | -22   | -39   | -9    | -192                  | -72   | -125  | -90   | -44    | 13     | -18   | -37   | -7    | vNH  | Group B |                 |
| (1158)               | (397) | (593) | (789) | (159)  | (192)  | (181) | (195) | (145) | (1122)           | (410) | (735) | (789) | (174)  | (201)  | (197) | (185) | (163) | (1125)                | (406) | (735) | (783) | (160)  | (188)  | (182) | (175) | (147) |      | 3430.0  | -81.5           |
| -204                 | -151  | -148  | -92   | -105   | -85    | -46   | -49   | -16   | -183             | -138  | -136  | -80   | -87    | -62    | -52   | -56   | -19   | -192                  | -147  | -141  | -90   | -96    | -74    | -50   | -51   | -17   |      | 3418.0  | -93.5           |
| (1158)               | (713) | (451) | (789) | (666)  | (384)  | (247) | (107) | (203) | (1122)           | (692) | (344) | (789) | (642)  | (440)  | (240) | (131) | (258) | (1125)                | (706) | (319) | (783) | (649)  | (380)  | (246) | (118) | (299) |      | 3353.0  | -158.5          |
|                      | -249  | -249  | -122  | -203   | -106   | -128  | -171  | -19   |                  | -219  | -222  | -110  | -177   | -84    | -120  | -153  | -22   |                       | -230  | -231  |       | -187   | -95    | -119  | -160  | -18   |      |         |                 |
|                      | (892) | (727) | (1)   | (1310) | (1379) | (568) | (971) | (104) |                  | (860) | (658) | (0)   | (1309) | (1276) | (556) | (953) | (71)  |                       | (834) | (671) |       | (1291) | (1355) | (543) | (942) | (7)   |      |         |                 |

<sup>1</sup> The experimental shifts were calculated relative to the corresponding monomer band positions at 3511.5 cm<sup>-1</sup>.

<sup>2</sup> The calculated unscaled harmonic vNH frequency of monomer are: 3681 cm<sup>-1</sup> (B3LYPD3) 3729 cm<sup>-1</sup> (MP2) and 3702 cm<sup>-1</sup> (B2PLYPD3).

**Table S4.** The MP2/6-311++G(3df,3pd) computed Cartesian coordinates (Å) of all optimized HNCO aggregates.**DIMER**

| D1                                    | D2                                    | D3                                   |
|---------------------------------------|---------------------------------------|--------------------------------------|
| 0 1                                   | 0 1                                   | 0 1                                  |
| H 0.49194000 0.66394200 0.21540300    | H 4.22527400 -0.81105300 0.25818500   | H 2.02252500 1.59541700 -0.00002000  |
| N 1.47471800 0.70488800 0.45171100    | N 3.62944000 -0.18046000 -0.24684500  | N 2.34236400 0.64164700 -0.00008600  |
| C 2.34360600 -0.04366800 0.04838900   | C 2.49112000 0.12771700 0.03468800    | C 1.59586700 -0.31794900 -0.00000400 |
| O 3.28061200 -0.68044700 -0.25387600  | O 1.39618000 0.52655900 0.17189600    | O 1.00514100 -1.33105500 0.00005900  |
| H -1.79213600 1.77197900 -0.59786800  | H -0.58828800 -0.13456200 0.12273400  | H -2.02253600 -1.59541500 0.00000600 |
| N -1.53659600 0.85836300 -0.25866200  | N -1.47626900 -0.61148100 0.13174400  | N -2.34236900 -0.64164300 0.00004300 |
| C -2.37009400 -0.01979700 -0.07189200 | C -2.56686700 -0.09320200 -0.01280500 | C -1.59586700 0.31794900 0.00000700  |
| O -3.04407800 -0.94428900 0.15039400  | O -3.67801700 0.25870500 -0.13521000  | O -1.00513400 1.33105100 -0.00002200 |
| D4                                    | D5                                    |                                      |
| 0 1                                   | 0 1                                   |                                      |
| H -2.22549900 1.90181400 -0.00007400  | H 1.35852100 -2.17424500 0.00033200   |                                      |
| N -2.70422300 1.01839100 0.00006000   | N 1.02395700 -1.22651300 -0.00040700  |                                      |
| C -2.16600000 -0.06982600 -0.00000500 | C 1.75384200 -0.24852100 -0.00001100  |                                      |
| O -1.79587900 -1.18330400 -0.00003500 | O 2.32284100 0.77277400 0.00016900    |                                      |
| H 0.48485900 -0.86211800 0.00000300   | H -1.35852600 2.17424600 0.00047200   |                                      |
| N 1.03571900 -0.01832800 0.00002200   | N -1.02395900 1.22651400 -0.00015800  |                                      |
| C 2.25407200 0.01942300 -0.00000600   | C -1.75384200 0.24852100 0.00008700   |                                      |
| O 3.40734500 0.21609000 -0.00001900   | O -2.32283900 -0.77277500 0.00016700  |                                      |

**TRIMER**

| T1                                    | T2                                    | T3                                    |
|---------------------------------------|---------------------------------------|---------------------------------------|
| 0 1                                   | 0 1                                   | 0 1                                   |
| H 0.91634700 1.03575700 0.00002900    | H -3.08301800 0.55142600 -0.00513100  | H -0.70176500 -0.38547500 -0.00009700 |
| N 1.68929600 0.37693000 0.00003400    | N -2.66914400 1.47144600 -0.00046200  | N -1.60688500 0.07777800 -0.00004600  |
| C 2.86822200 0.69566400 -0.00000100   | C -1.49167400 1.74362300 0.00111900   | C -2.67692100 -0.51043900 -0.00009900 |
| O 4.02517700 0.85581200 -0.00003200   | O -0.38784200 2.15533600 0.00339100   | O -3.76413300 -0.93885700 -0.00013100 |
| H -1.35516000 0.27569900 0.00000200   | H 1.29944100 0.96919400 0.00338600    | H 1.94398400 -0.03928800 -0.00012400  |
| N -1.17107400 1.27450700 0.00001700   | N 1.81322000 0.09589700 0.00235800    | N 1.33106500 -0.84553200 -0.00012000  |
| C -2.03657500 2.13611300 0.00000600   | C 3.03533200 0.03946900 -0.00226700   | C 1.75877200 -1.99295700 -0.00005200  |
| O -2.75375100 3.05798800 0.00000000   | O 4.18446100 -0.16049100 -0.00646400  | O 2.02131700 -3.12914100 0.00001000   |
| N -0.51821700 -1.65143000 -0.00000900 | N -0.31292900 -2.04213700 0.01519100  | N -0.19376000 2.80017300 0.00026900   |
| C -0.83164800 -2.83177700 -0.00000600 | C -1.48585800 -1.75560800 -0.00001800 | C 0.95073800 2.40509000 0.00014200    |
| H 0.43882100 -1.31145600 0.00001000   | H 0.49592800 -1.42814300 0.01016700   | H -0.99992800 2.18750800 0.00019400   |
| O -1.27143200 -3.91380500 -0.00000900 | O -2.65626700 -1.61157200 -0.01205500 | O 2.09897100 2.14301800 0.00004000    |
| T4                                    | T5                                    | T6                                    |
| 0 1                                   | 0 1                                   | 0 1                                   |
| H -1.55563200 2.01498300 0.05978700   | H -1.95737500 0.67461000 0.56456400   | H -1.92843700 0.93901000 0.11653900   |
| N -0.74066400 2.60170900 0.16451600   | N -1.16885600 1.30890700 0.51873200   | N -1.07383400 1.36123800 0.44410200   |
| C 0.41866300 2.31325900 -0.01175100   | C -0.08971300 1.15389600 -0.00209700  | C 0.05555400 1.20719700 0.04230900    |
| O 1.58175800 2.17443800 -0.14273500   | O 0.99421700 1.14973000 -0.46146600   | O 1.19758800 1.16639100 -0.23682300   |
| H 2.52284400 0.33972700 0.05992200    | H 2.66815500 0.03480400 -0.08012700   | H 2.80249600 -0.09527100 -0.02870400  |
| N 2.62348400 -0.65941600 0.16468000   | N 3.37908600 -0.62967600 0.18782100   | N 3.51055400 -0.80362400 0.09352600   |
| C 1.79402300 -1.51919600 -0.01164700  | C 4.57122100 -0.53507000 -0.02954200  | C 4.71230600 -0.64178400 0.01289400   |
| O 1.09226100 -2.45705400 -0.14267900  | O 5.73494700 -0.58374000 -0.16394100  | O 5.88405300 -0.64146800 -0.03244100  |
| N -1.88281700 -1.94229100 0.16454400  | N -3.53594500 -0.59239000 0.78205700  | N -5.55901800 -1.31000000 0.11486400  |
| C -2.21268500 -0.79406200 -0.01172400 | C -4.44984500 -0.63581300 -0.03482100 | C -4.66735700 -0.51503200 -0.08325600 |
| H -0.96721000 -2.35470300 0.05981800  | O -5.23795900 -0.57299100 -0.88976800 | H -6.37331400 -1.18701900 0.68851300  |
| O -2.67402200 0.28261300 -0.14270800  | H -3.55039300 -1.15937600 1.61546300  | O -3.73760000 0.13853800 -0.37766900  |

|               |             |             |  |               |             |             |  |               |             |             |  |
|---------------|-------------|-------------|--|---------------|-------------|-------------|--|---------------|-------------|-------------|--|
| T7            |             |             |  | T8            |             |             |  | T9            |             |             |  |
| 0 1           |             |             |  | 0 1           |             |             |  | 0 1           |             |             |  |
| H 0.81971400  | 1.78182700  | -0.00435500 |  | H 0.28948700  | -0.91231800 | 0.23021500  |  | H 0.07646500  | -1.91503900 | 0.00003900  |  |
| N -0.02554500 | 2.33570200  | -0.02909800 |  | N -0.29436700 | -0.08952200 | 0.21012300  |  | N 0.52748500  | -1.01533100 | 0.00006300  |  |
| C -1.14662700 | 1.86145900  | -0.03019100 |  | C 0.21392700  | 1.01627500  | 0.08336600  |  | C -0.08436400 | 0.03663300  | 0.00005100  |  |
| O -2.27816700 | 1.55558100  | -0.03539500 |  | O 0.56054700  | 2.12474600  | -0.03164200 |  | O -0.54385800 | 1.11488600  | 0.00004300  |  |
| H 3.54578400  | 1.38251400  | 0.27196400  |  | H 3.15707500  | 1.22725900  | -0.16167700 |  | H 3.29232800  | 2.09328400  | 0.00001200  |  |
| N 2.73442600  | 0.81488000  | 0.09254700  |  | N 3.09965400  | 0.22443900  | -0.08413200 |  | N 2.84020500  | 1.19540300  | -0.00000100 |  |
| C 2.75083200  | -0.40158400 | 0.00948000  |  | C 4.08226700  | -0.50235800 | -0.10618900 |  | C 3.44790800  | 0.13637600  | 0.00000600  |  |
| O 2.60710400  | -1.55688300 | -0.09709900 |  | O 4.91618000  | -1.31970900 | -0.11031800 |  | O 3.89079600  | -0.94517500 | 0.00001200  |  |
| H 0.26593600  | -1.90296300 | -0.07727400 |  | N -3.29931700 | -0.57201900 | 0.73987900  |  | N -3.90189900 | 0.86427400  | -0.00006000 |  |
| N -0.48473000 | -1.23271600 | -0.01779800 |  | C -4.23611200 | -0.48074600 | -0.02905500 |  | C -3.32221000 | -0.20501800 | -0.00005700 |  |
| C -1.65974400 | -1.57183700 | 0.02199900  |  | H -2.32903200 | -0.37396000 | 0.53076600  |  | H -3.42202300 | 1.74877000  | -0.00003500 |  |
| O -2.81234500 | -1.75053100 | 0.06779300  |  | O -5.22920300 | -0.44007300 | -0.65168000 |  | O -2.90385100 | -1.30038500 | -0.00005900 |  |

**Table S5.** Harmonic unscaled and anharmonic fundamental vibrational wavenumbers of HNCO (cm<sup>-1</sup>).

| Mode                | Sym. | Harmonic <sup>1</sup> |      |         | Anharmonic <sup>1</sup> |      |                                  |                              | Exp <sup>5</sup> |
|---------------------|------|-----------------------|------|---------|-------------------------|------|----------------------------------|------------------------------|------------------|
|                     |      | B3LYPD3               | MP2  | CCSD(T) | B3LYPD3                 | MP2  | CCSD(T)/<br>B3LYPD3 <sup>2</sup> | CCSD(T)/<br>MP2 <sup>3</sup> |                  |
| vNH                 | A'   | 3681                  | 3729 | 3697    | 3516                    | 3566 | 3533                             | 3534                         | 3516.8/3505.7    |
| v <sub>as</sub> NCO | A'   | 2330                  | 2337 | 2304    | 2291                    | 2301 | 2265                             | 2268                         | 2259             |
| v <sub>s</sub> NCO  | A'   | 1336                  | 1306 | 1307    | 1282                    | 1263 | 1253                             | 1264                         | n.o.             |
| δHNC                | A'   | 798                   | 785  | 814     | 765                     | 758  | 782                              | 787                          | 769.8            |
| γNCO                | A''  | 639                   | 636  | 633     | 662                     | 658  | 656                              | 655                          | n.o.             |
| δNCO                | A'   | 576                   | 571  | 565     | 584                     | 580  | 573                              | 574                          | 573.7            |
| MAE <sup>4</sup>    |      | 18                    | 17   |         | 13                      | 29   | 10                               | 12                           |                  |
| MAX  <sup>4</sup>   |      | 29                    | 33   |         | 32                      | 54   | 22                               | 22                           |                  |

<sup>1</sup> Computed with the 6-311++G(3df,3pd) basis set. <sup>2</sup>Hybrid computations, harmonic wavenumbers computed at the CCSD(T)/6-311++G(3df,3pd) level and anharmonic corrections from B3LYPD3/6-311++G(3df,3pd). <sup>3</sup> Hybrid computations, harmonic wavenumbers computed at the CCSD(T)/6-311++G(3df,3pd) level and anharmonic corrections from MP2/6-311++G(3df,3pd). <sup>4</sup> Mean (MAE) and maximum (|MAX|) absolute deviations with respect to the CCSD(T) and experimental values, for the harmonic and anharmonic wavenumbers, respectively. <sup>5</sup> From ref. [14].
